# Supplementary material for: Thiol-initiated photocatalytic oxidative cleavage of the CC bond in olefins and its extension to direct production of acetals from olefins
Source: Royal Society of Chemistry journal article supplement (doi:10.1039/d0cy01963a), 2020-11-24
Supplement: d0cy01963a1.pdf [file d0cy01963a1.pdf]

## Supporting Information

### Experimental procedure

All the reagents were commercially available and used without further purifications. For the synthesis of  $\text{ZnIn}_2\text{S}_4$ ,  $\text{ZnCl}_2$  (0.136 g, 1 mmol),  $\text{InCl}_3 \cdot 4\text{H}_2\text{O}$  (0.586 g, 2 mmol) and thioacetamide (TAA) (0.3 g, 4 mmol) were added in a mixed solution containing 30 mL of *N,N*-dimethylformamide (DMF) and 30 mL of ethylene glycol (EG) under vigorous stirring. The resultant suspension was transferred to a 100 mL Teflon liner, sealed and heated at 180 °C for 18 h. After the reaction, the autoclave was cooled, and the product was collected and washed with deionized water and ethanol for several times and dried at 60 °C for 12 h.

### Catalytic reactions

The oxidative cleavage reactions of olefins were carried out in a sealed reaction tube irradiated with an LED lamp (Beijing Perfect Light, PCX50B). The catalyst (10 mg), benzyl mercaptane (0.1 mmol) and olefins (0.1 mmol) were suspended in a Schlenk tube containing acetonitrile ( $\text{CH}_3\text{CN}$ , 4 ml), with the reaction vial open to air. The reaction was performed under irradiation for 15 h with an LED lamp (65 mW  $\text{cm}^{-2}$ ) irradiated from bottom, with the reaction suspension continuously stirring during the whole reaction. The mixture was filtered through a porous membrane (20  $\mu\text{m}$  in diameter) and the filtrate was analyzed by GC-MS and GC-FID (Shimadzu GC-2014) equipped with an HP-5 capillary column.

To obtain the AQE of the photocatalytic oxidative cleavage of styrene over  $\text{ZnIn}_2\text{S}_4$  at 420, 460 and 500 nm, the reaction system was irradiated by a LED lamp with a bandpass filter which centered at 420, 460 and 500 nm, respectively. The AQE was calculated based on the following equation:

$$\text{AQE (\%)} = \frac{n \times M \times N_A \times h \times c}{S \times P \times t \times \lambda} \times 100$$

n: Number of electrons transferred by reaction

M: The amount of product

S: Light receiving area

P: Light intensity

t: Reaction time

$\lambda$ : Incident light wavelength

$N_A$ : Avogadro constant, h: Planck constant, c: Speed of light.

### **Detection of the intermediate dioxetane**

The catalyst  $\text{ZnIn}_2\text{S}_4$  (10 mg), benzyl mercaptane (0.1 mmol), styrene (0.1 mmol) and L-methionine (0.2 mmol) were suspended in a Schlenk tube containing  $\text{CH}_3\text{CN}$  (3.5 ml) and  $\text{H}_2\text{O}$  (0.5 ml), with the reaction vial open to air. The reaction was performed under irradiation for 15 h with an LED lamp ( $65 \text{ mW cm}^{-2}$ ) irradiated from bottom, with the reaction suspension continuously stirring during the whole reaction. Analysis by GC-MS showed the formation of 1-phenyl-1,2-ethanediol. MS (EI): fragmentation pattern was in accord with the one in database for 1-phenyl-1,2-ethanediol.

### **Characterizations**

The X-ray diffraction (XRD) patterns of the resultant products were collected on a MiniFlex600 X-ray diffractometer (Rigaku, Japan) using  $\text{Cu K}\alpha$  ( $\lambda = 1.5406 \text{ \AA}$ ) radiation. The accelerating voltage and the applied current were 40 kV and 15 mA, respectively. XRD patterns were scanned over the angular range of  $5\text{--}90^\circ$  ( $2\theta$ ) with a step size of  $0.02^\circ$ . The morphology of the samples was examined by field emission scanning electron microscopy (SEM) (JSM-6700F). UV-visible diffuse reflectance spectra (UV-vis DRS) of the powders were obtained for the dry-pressed disk samples using a UV-vis spectrophotometer (Cary 500 Scan Spectrophotometers, Varian, USA).  $\text{BaSO}_4$  was used as a reflectance standard. BET surface area measurements were carried out on an ASAP 2020M apparatus (Micromeritics Instrument Corp., USA). The samples were degassed in vacuum at  $150^\circ \text{C}$  for 10 h and then measured at  $-196^\circ \text{C}$ . The ESR spectra were determined on a Bruker A300 ESR spectrometer.

**Figure S1** XRD pattern of  $\text{ZnIn}_2\text{S}_4$

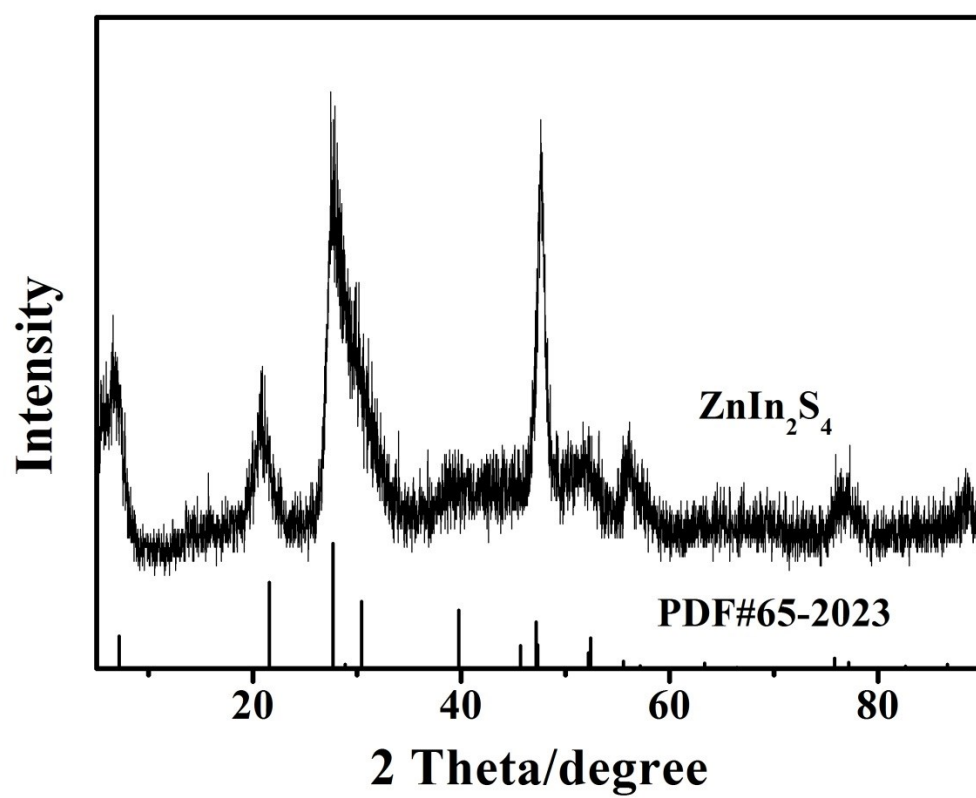

**Figure S2** SEM image of  $\text{ZnIn}_2\text{S}_4$

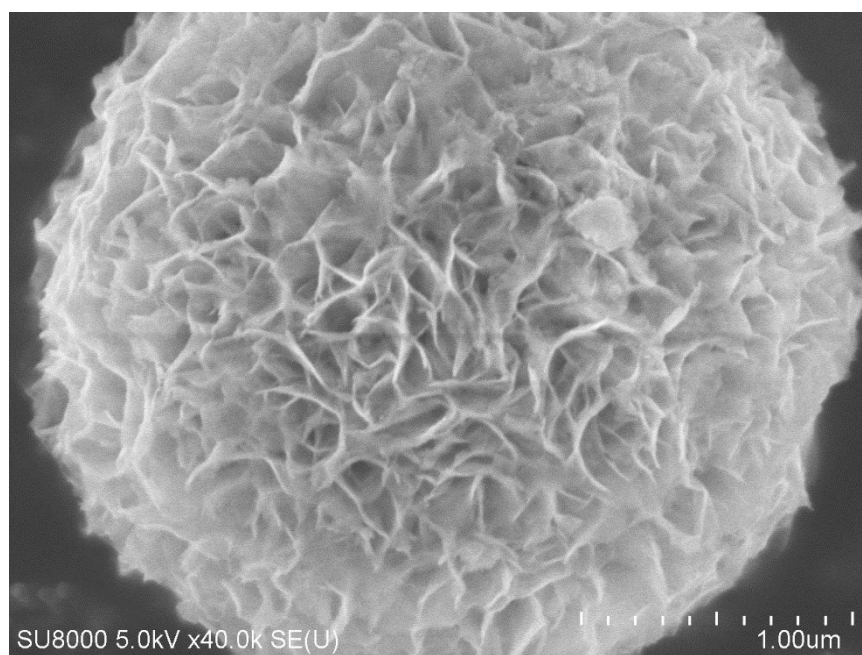

**Figure S3** Nitrogen adsorption–desorption isotherms of  $\text{ZnIn}_2\text{S}_4$ . Inset: Pore size distribution curve of the as-prepared samples calculated from desorption branch of the nitrogen isotherm by the BJH method

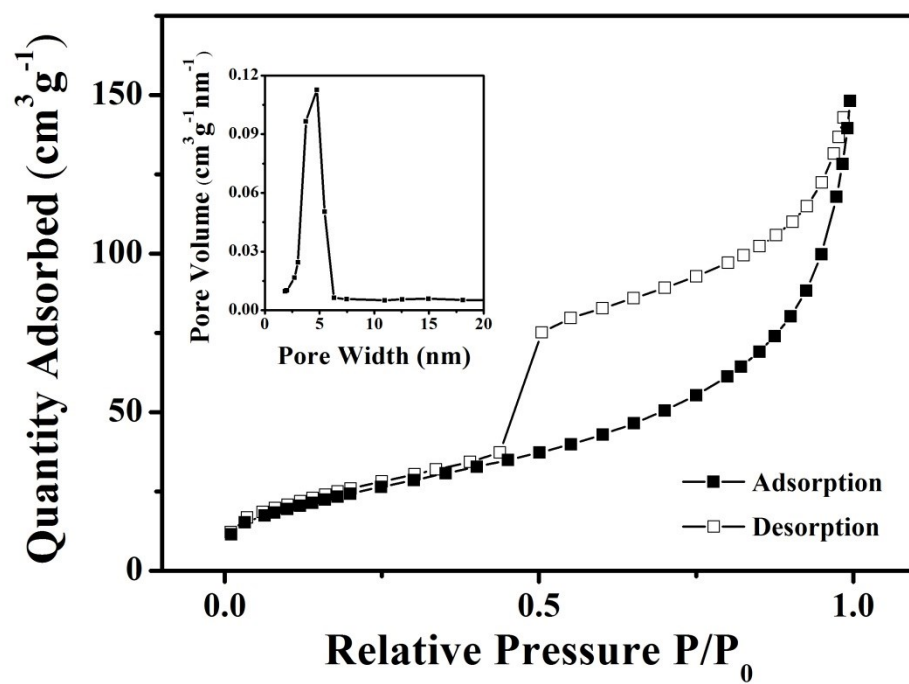

**Figure S4** UV-Vis diffuse reflectance spectra of  $\text{ZnIn}_2\text{S}_4$

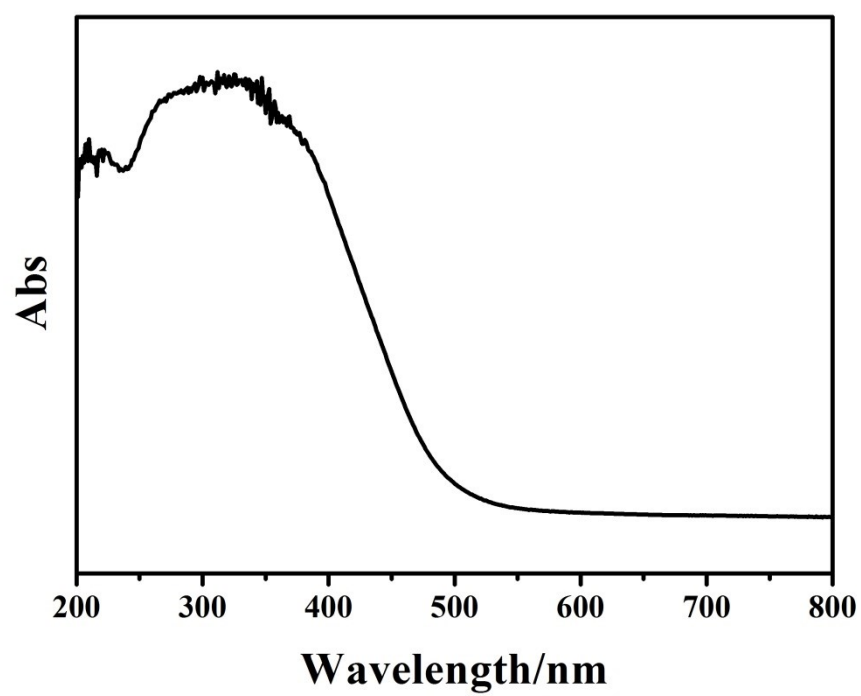

**Figure S5** (a) The AQE of the photocatalytic oxidative cleavage of styrene at 420 nm, 460 nm and 500 nm; (b) UV-vis DRS of  $\text{ZnIn}_2\text{S}_4$ .

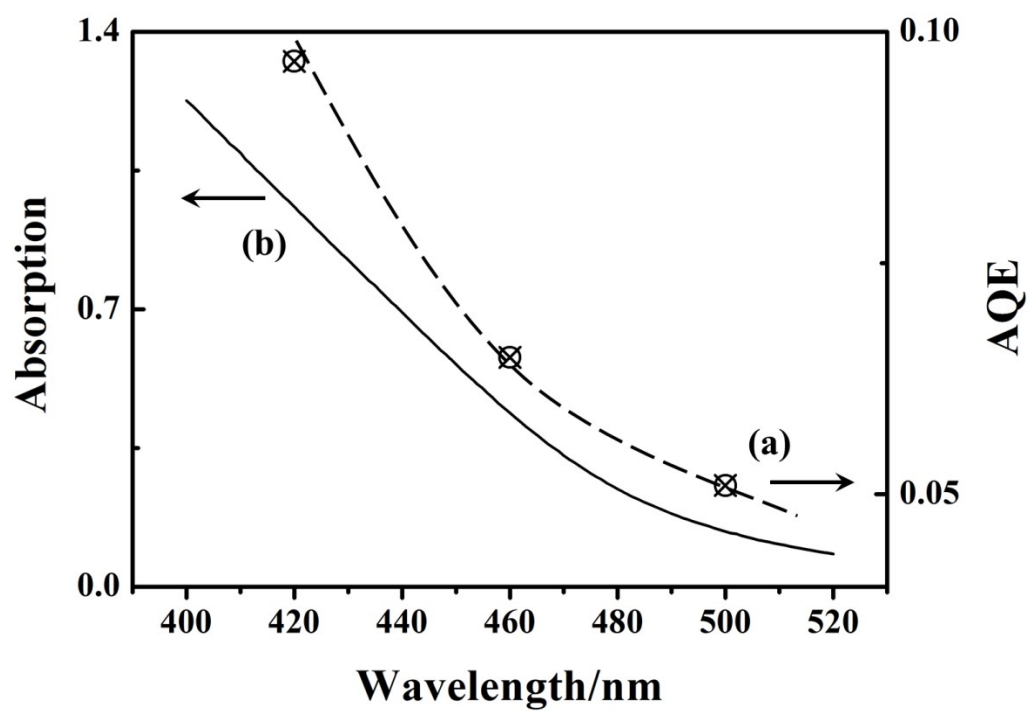

**Figure S6** GC-MS signals of the intermediate dioxetane trapped by methionine

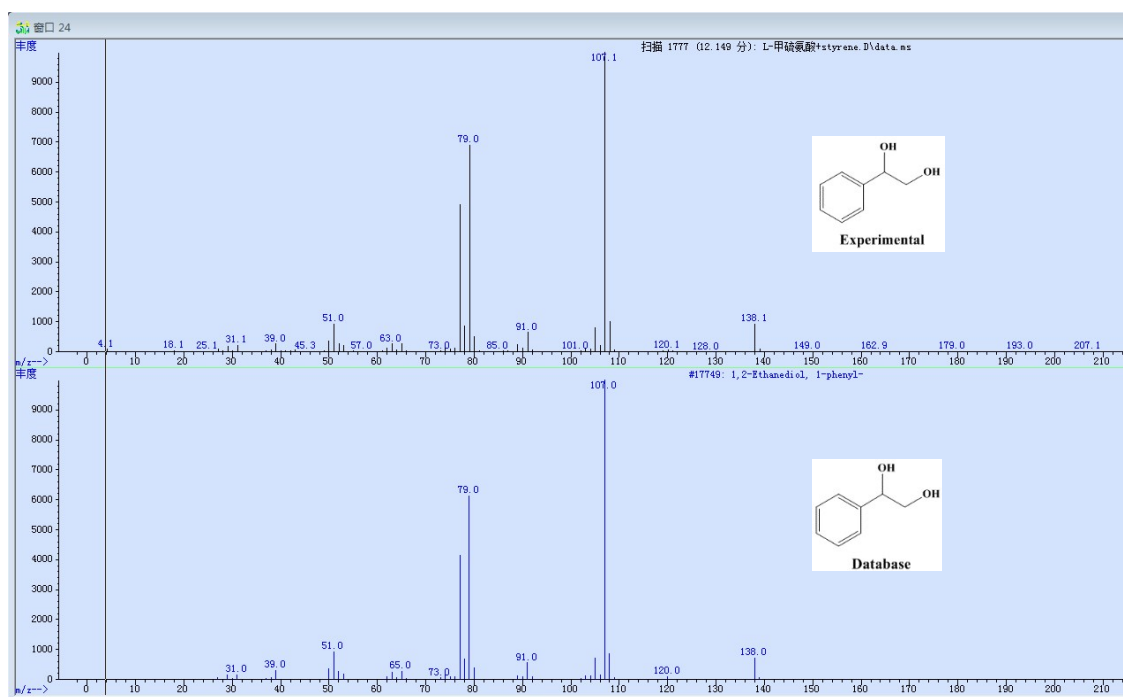

**Figure S7** Cycling of  $\text{ZnIn}_2\text{S}_4$  for the oxidative cleavage of olefins in the presence of benzyl mercaptane under visible-light irradiation

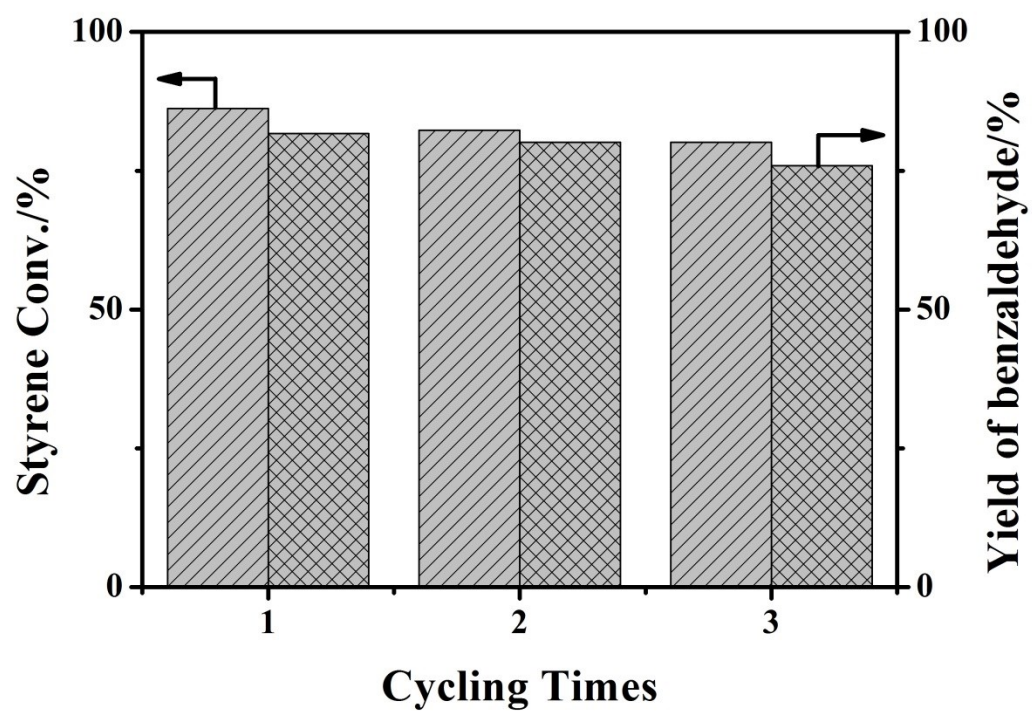

**Figure S8** XRD diffraction patterns of (a) fresh  $\text{ZnIn}_2\text{S}_4$  and (b) used  $\text{ZnIn}_2\text{S}_4$  (after three cycling reactions for the oxidative cleavage of olefins in the presence of benzyl mercaptane)

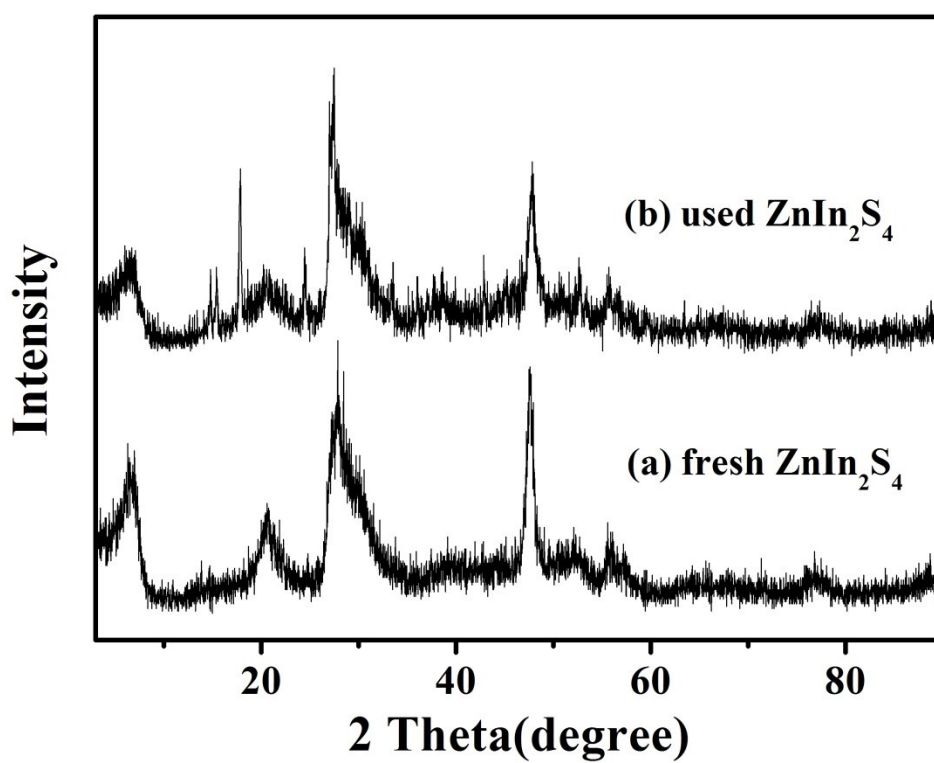

**Table S1** Controlled experiments carried out in the presence of either DMPO or benzoquinone

| 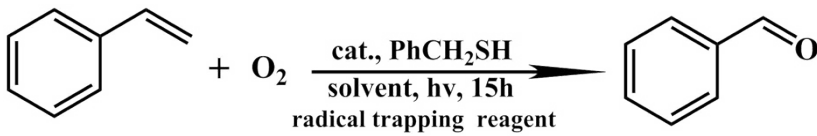 |                                |                   |                        |
|------------------------------------------------------------------------------------|--------------------------------|-------------------|------------------------|
| Entry                                                                              | Radical trapping<br>(0.2 mmol) | Styrene/<br>Conv. | Benzaldehyde/<br>Yield |
| 1                                                                                  | -                              | 81%               | 78%                    |
| 2                                                                                  | DMPO                           | 5%                | -                      |
| 3                                                                                  | Benzoquinone                   | 7%                | -                      |

Conditions: styrene (0.1 mmol), benzyl mercaptane (0.1 mmol), ZnIn<sub>2</sub>S<sub>4</sub> (10 mg), CH<sub>3</sub>CN (4 mL), under air, visible light irradiation for 15 h.
